# Supplementary material
Source: PubMed Central journal article supplement (PMC2504839)
Supplement: 0801974105_0801974105SI.pdf [file 0801974105_0801974105SI.pdf]

# Supporting Information

Di Giacco *et al.* 10.1073/pnas.0801974105

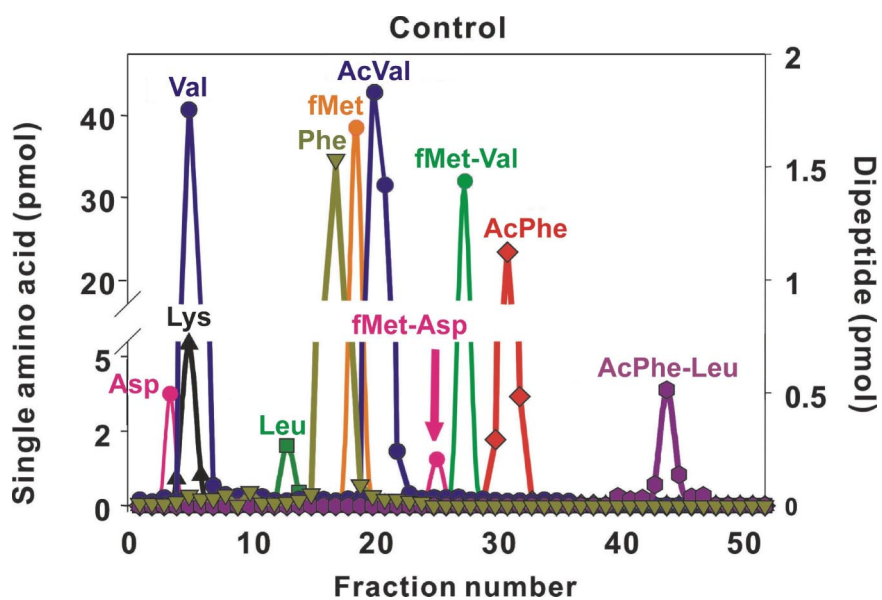

Fig. S1. HPLC pattern of superimposed control runs by using selected amino acids and the dipeptides fMet-Asp, fMet-Val, and AcPhe-Leu.

**Table S1. Cognate and noncognate dipeptide formation in the absence (Pi state) and presence of an E-tRNA (POST state)**

| Complex                      |      |                 | Dipeptides, pmol   |                        | Error, %  |
|------------------------------|------|-----------------|--------------------|------------------------|-----------|
| tRNA selection at the A-site | mRNA | State (E-site)  | AcPhe-Lys, cognate | AcPhe-Leu, non-cognate |           |
| Cognate versus noncognate    | MFK  | Pi(free)        | 18.8 ± 1.9         | 0.74 ± 0.06            | 3.8 ± 0.2 |
|                              |      | POST (occupied) | 12.3 ± 1.0         | <0.03                  | 0         |

The percent error is the ratio (incorrect dipeptides)/(correct + incorrect dipeptides) × 100.
